# Supplementary material for: Mechanisms of Tumor-Induced Lymphovascular Niche Formation in Draining Lymph Nodes
Source: PubMed Central journal article supplement (PMC6315107; doi:10.1016/j.celrep.2018.12.002), 2018-12-26
Supplement: mmc1.pdf [file mmc1.pdf]

**Cell Reports, Volume 25**

**Supplemental Information**

**Mechanisms of Tumor-Induced  
Lymphovascular Niche Formation  
in Draining Lymph Nodes**

**Catharina D. Commerford, Lothar C. Dieterich, Yuliang He, Tanja Hell, Javier A. Montoya-Zegarra, Simon F. Noerrellykke, Erica Russo, Martin Röcken, and Michael Detmar**

**Figure S1:**

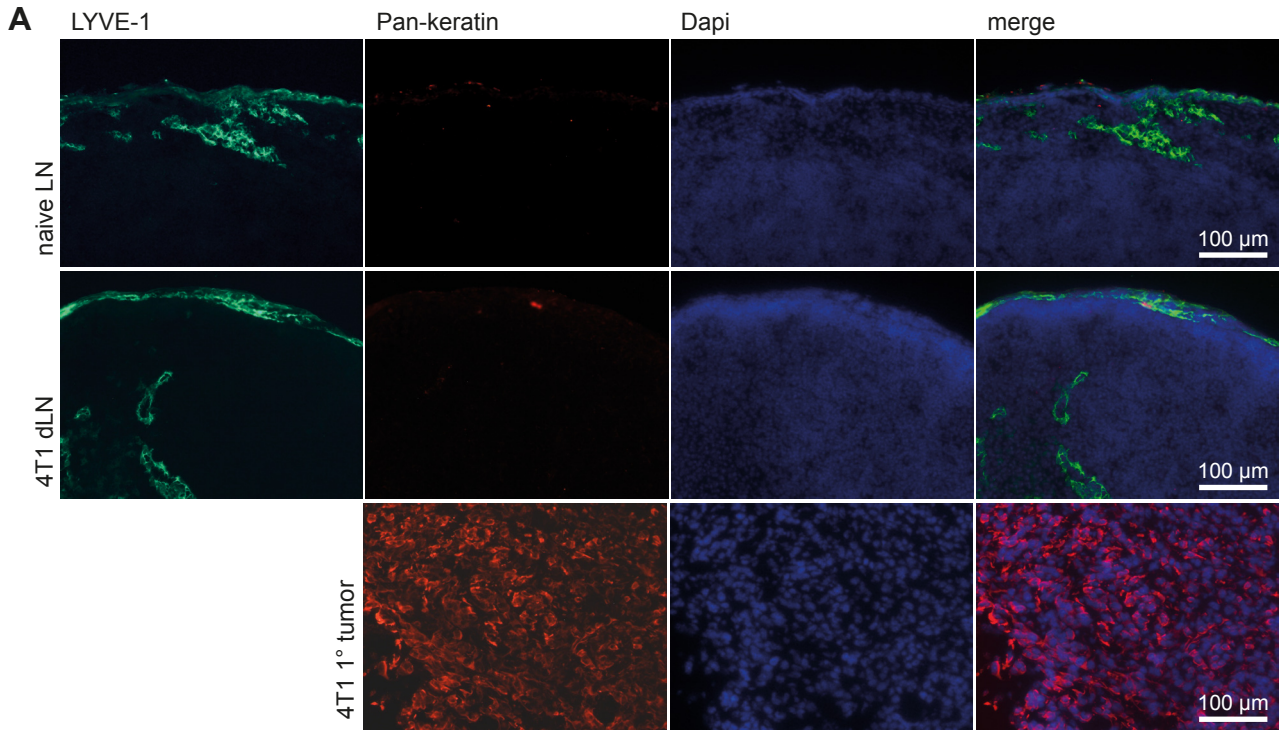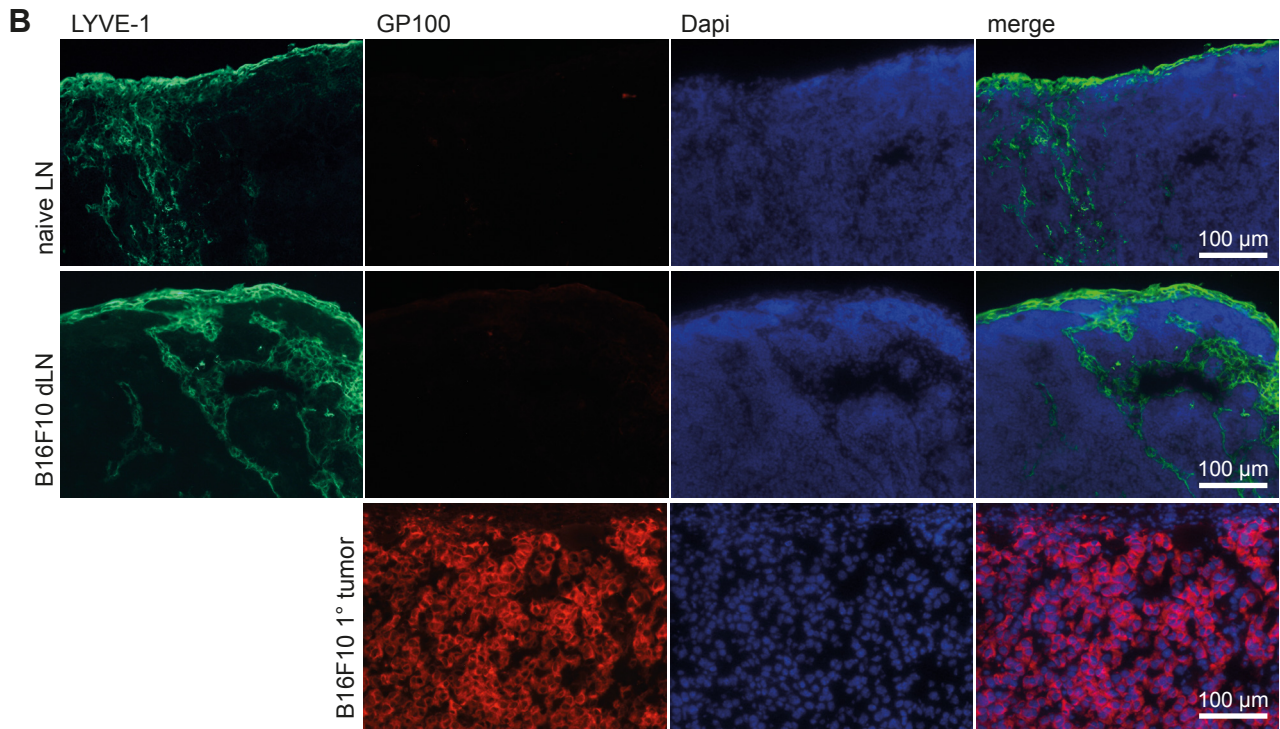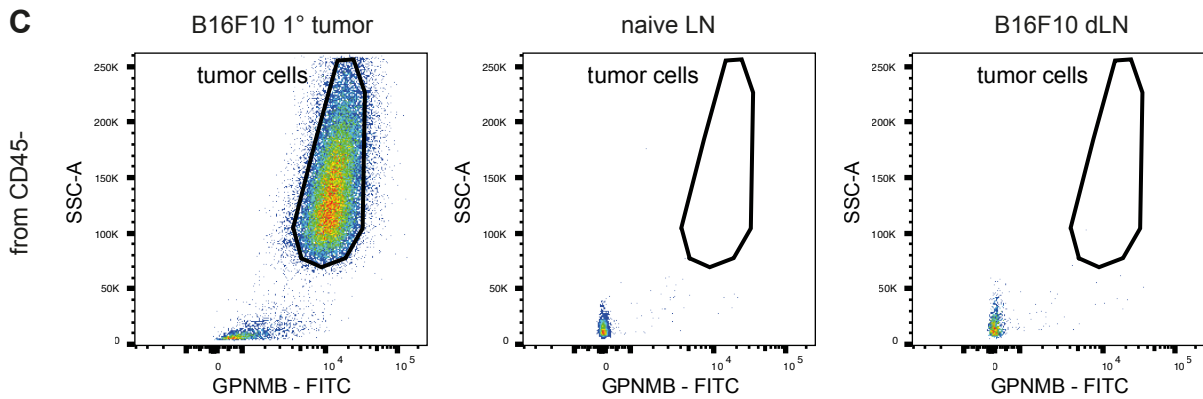

**Figure S1. No metastatic tumor cells in 4T1 and B16F10 tumor-draining LNs. Related to Figure 1.**

(A and B) Representative immunofluorescence images of naïve LNs, tumor-draining LNs, and primary tumors stained for (A) pan-keratin or (B) the melanoma marker gp100. The pan-keratin staining shows some artefacts in both naïve, as well as 4T1 tumor-draining LNs. (C) Representative FACS plots showing GPNMB+ melanoma cells in B16F10 primary tumors but not in naïve or tumor-draining LNs. Cells were pre-gated on single, living, CD45- cells.

**Figure S2:**

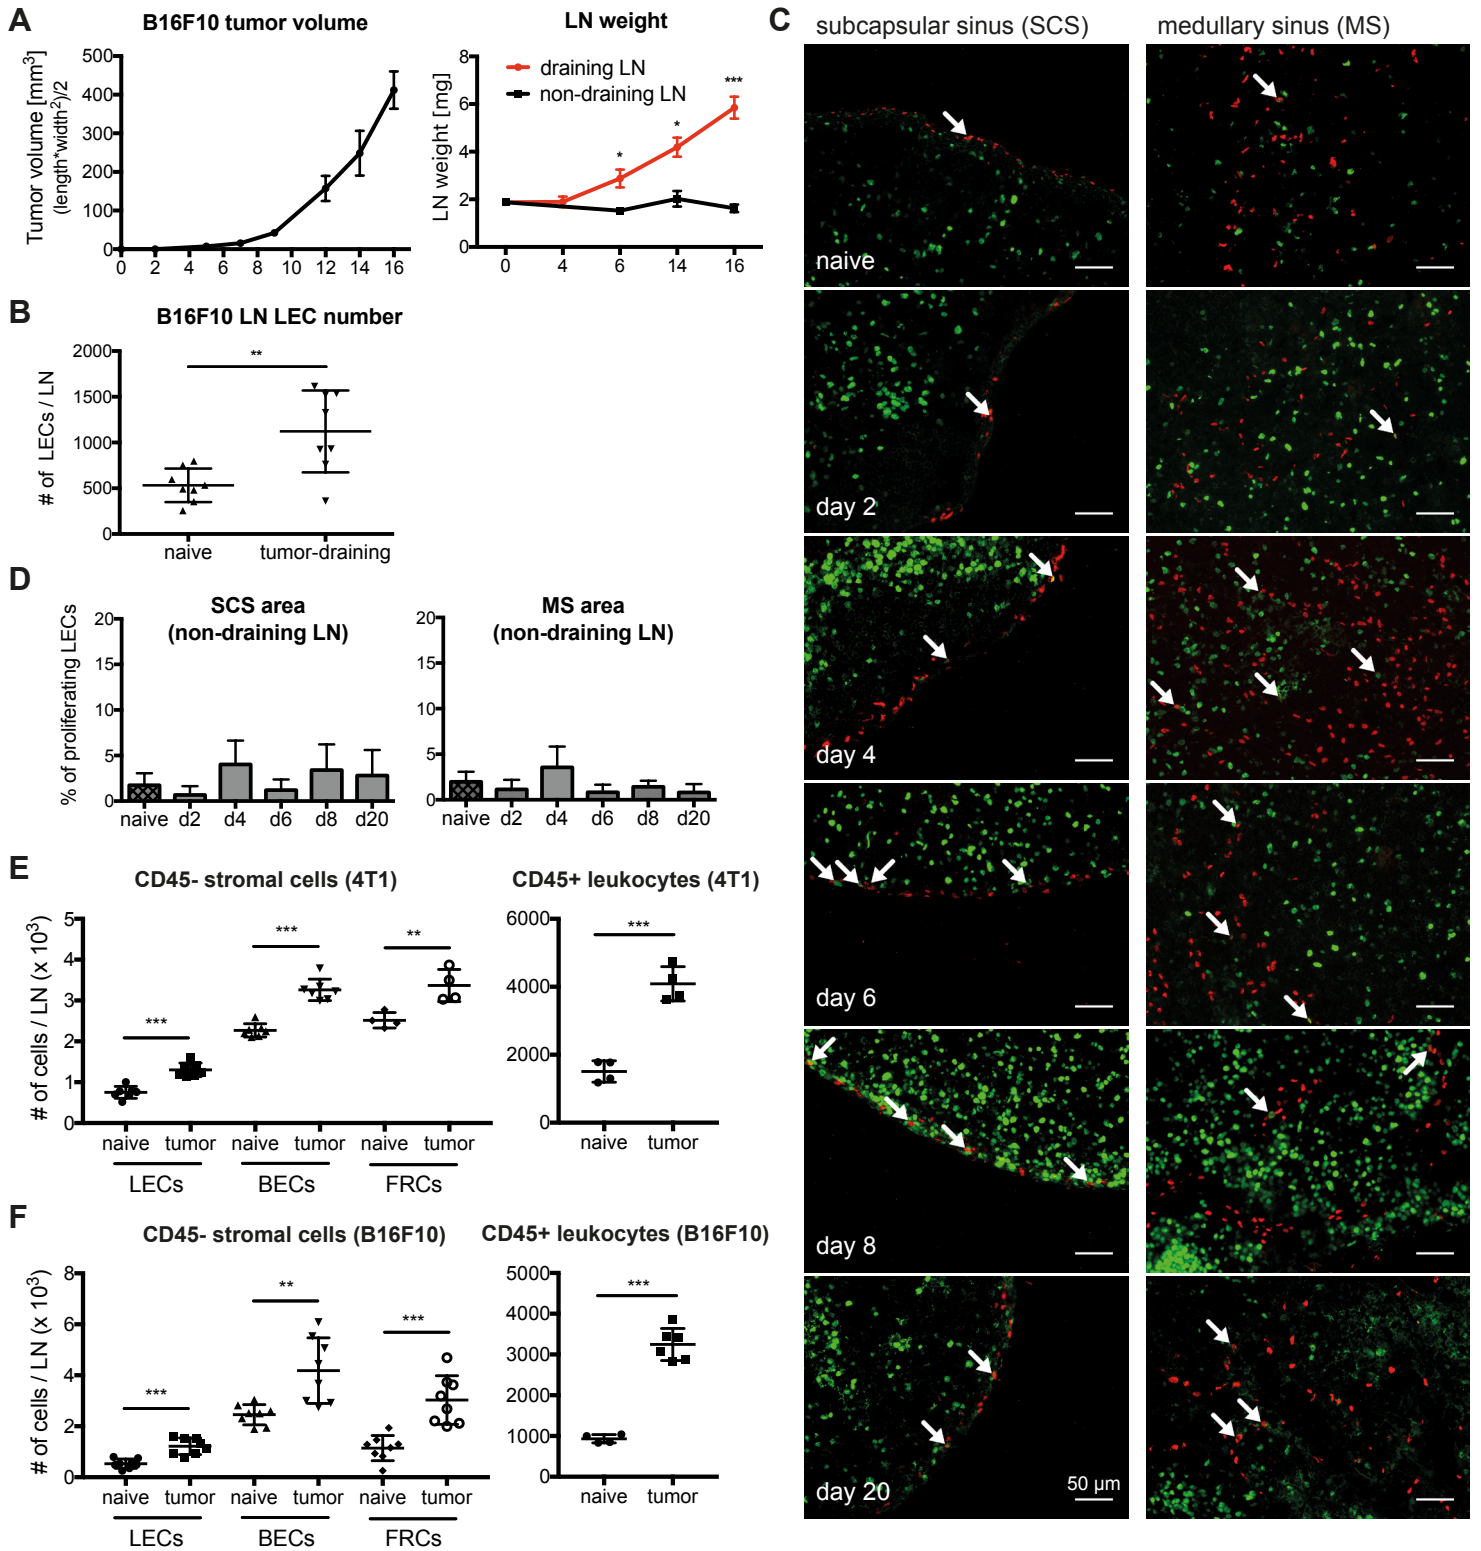

**Figure S2. LN weight and LEC proliferation increase over time in tumor-draining LNs.**

**Related to Figure 1.**

(A) B16F10 primary tumor growth assessed by caliper measurements *in vivo* and *ex vivo* inguinal LN weight.

(B) FACS quantification of LEC numbers in naïve and B16F10 tumor-draining LNs at day 14.

(C) Representative images of the subcapsular and medullary sinus (SCS & MS) of 4T1 tumor-draining LNs at different time points stained for Prox1 (red) and Ki67 (green), with arrows indicating proliferating LECs.

(D) Quantification of proliferation in the SCS & MS of non-draining contralateral inguinal LNs in 4T1 mice.

(E and F) FACS quantification shows increased LEC, BEC, FRC and leukocyte numbers in (E) 4T1 and (F)

B16F10 tumor-draining LNs compared to the respective naïve control LNs. Statistical significance was determined with the unpaired student t-test (A, B, E, F) or one-way ANOVA (D).

**Figure S3:**

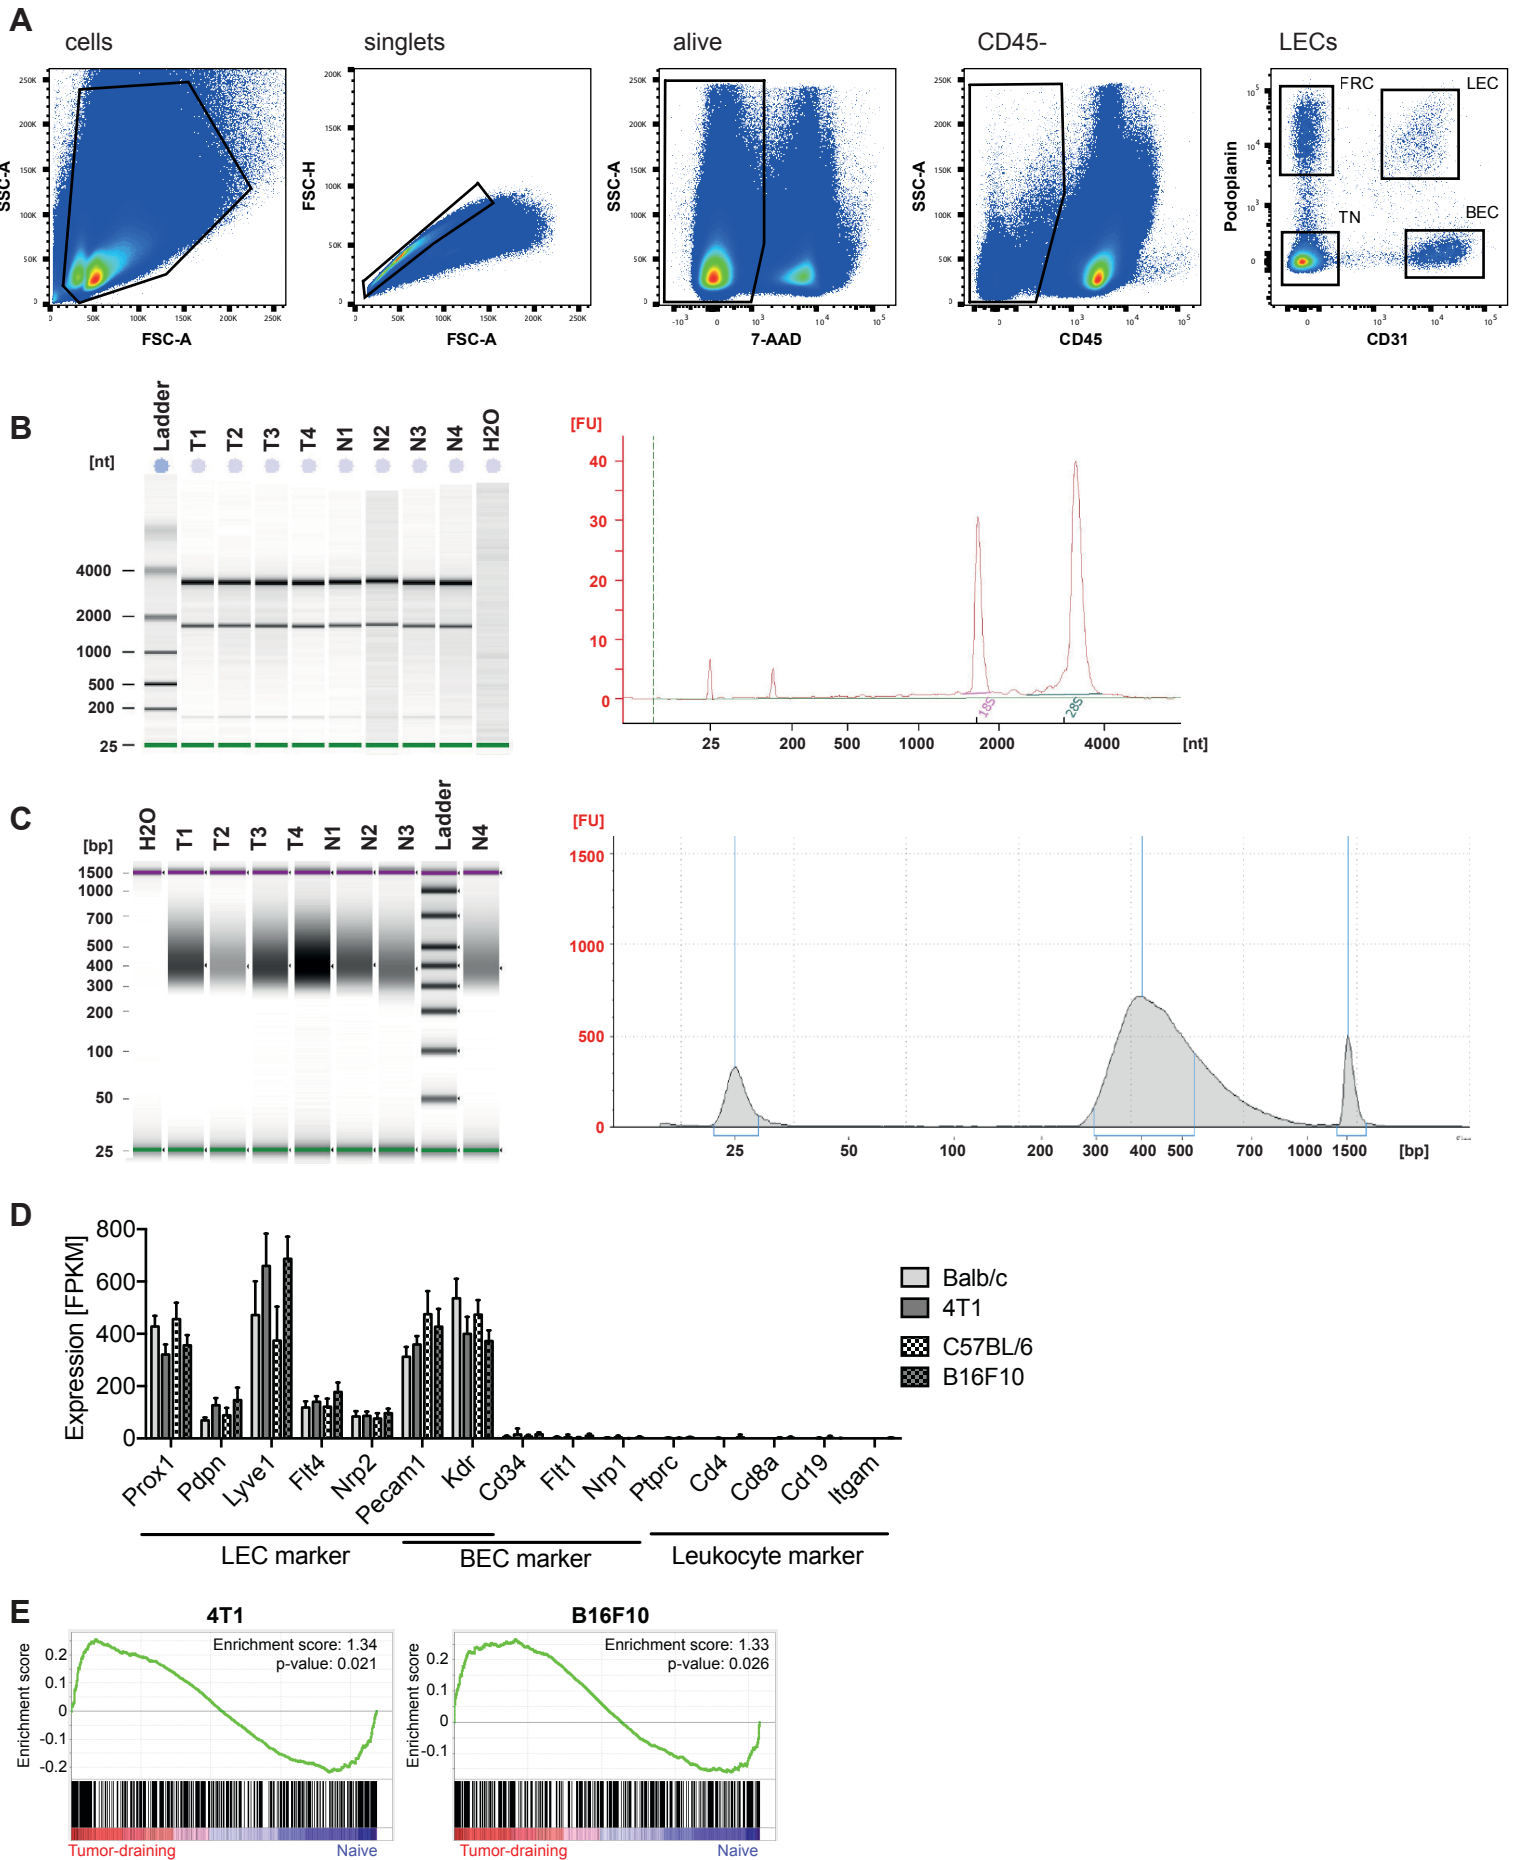

**Figure S3. Quality controls for RNA sequencing and gene set enrichment analysis. Related to Figure 2.**

(A) FACS gating strategy for LN stromal cells. (B and C) Representative gels and histograms of (B) RNA and (C) cDNA samples from naïve and 4T1 tumor mice. (B) RNA quality as assessed by Agilent Bioanalyzer (RIN 7.8-10). (C) cDNA libraries with fragments between 300-500 bp length and without contaminations as tested on an Agilent TapeStation. (D) Relative expression of LEC-, BEC- and leukocyte-specific genes as measure for the high purity of sorted and sequenced LN LECs. (E) Gene set enrichment analysis of previously published sprouting tip cell-associated genes (del Toro et al., 2010; Strasser et al., 2010) among the differentially expressed genes in LN LECs in the 4T1 (left panel) and B16F10 (right panel) tumor models.

**Figure S4:**

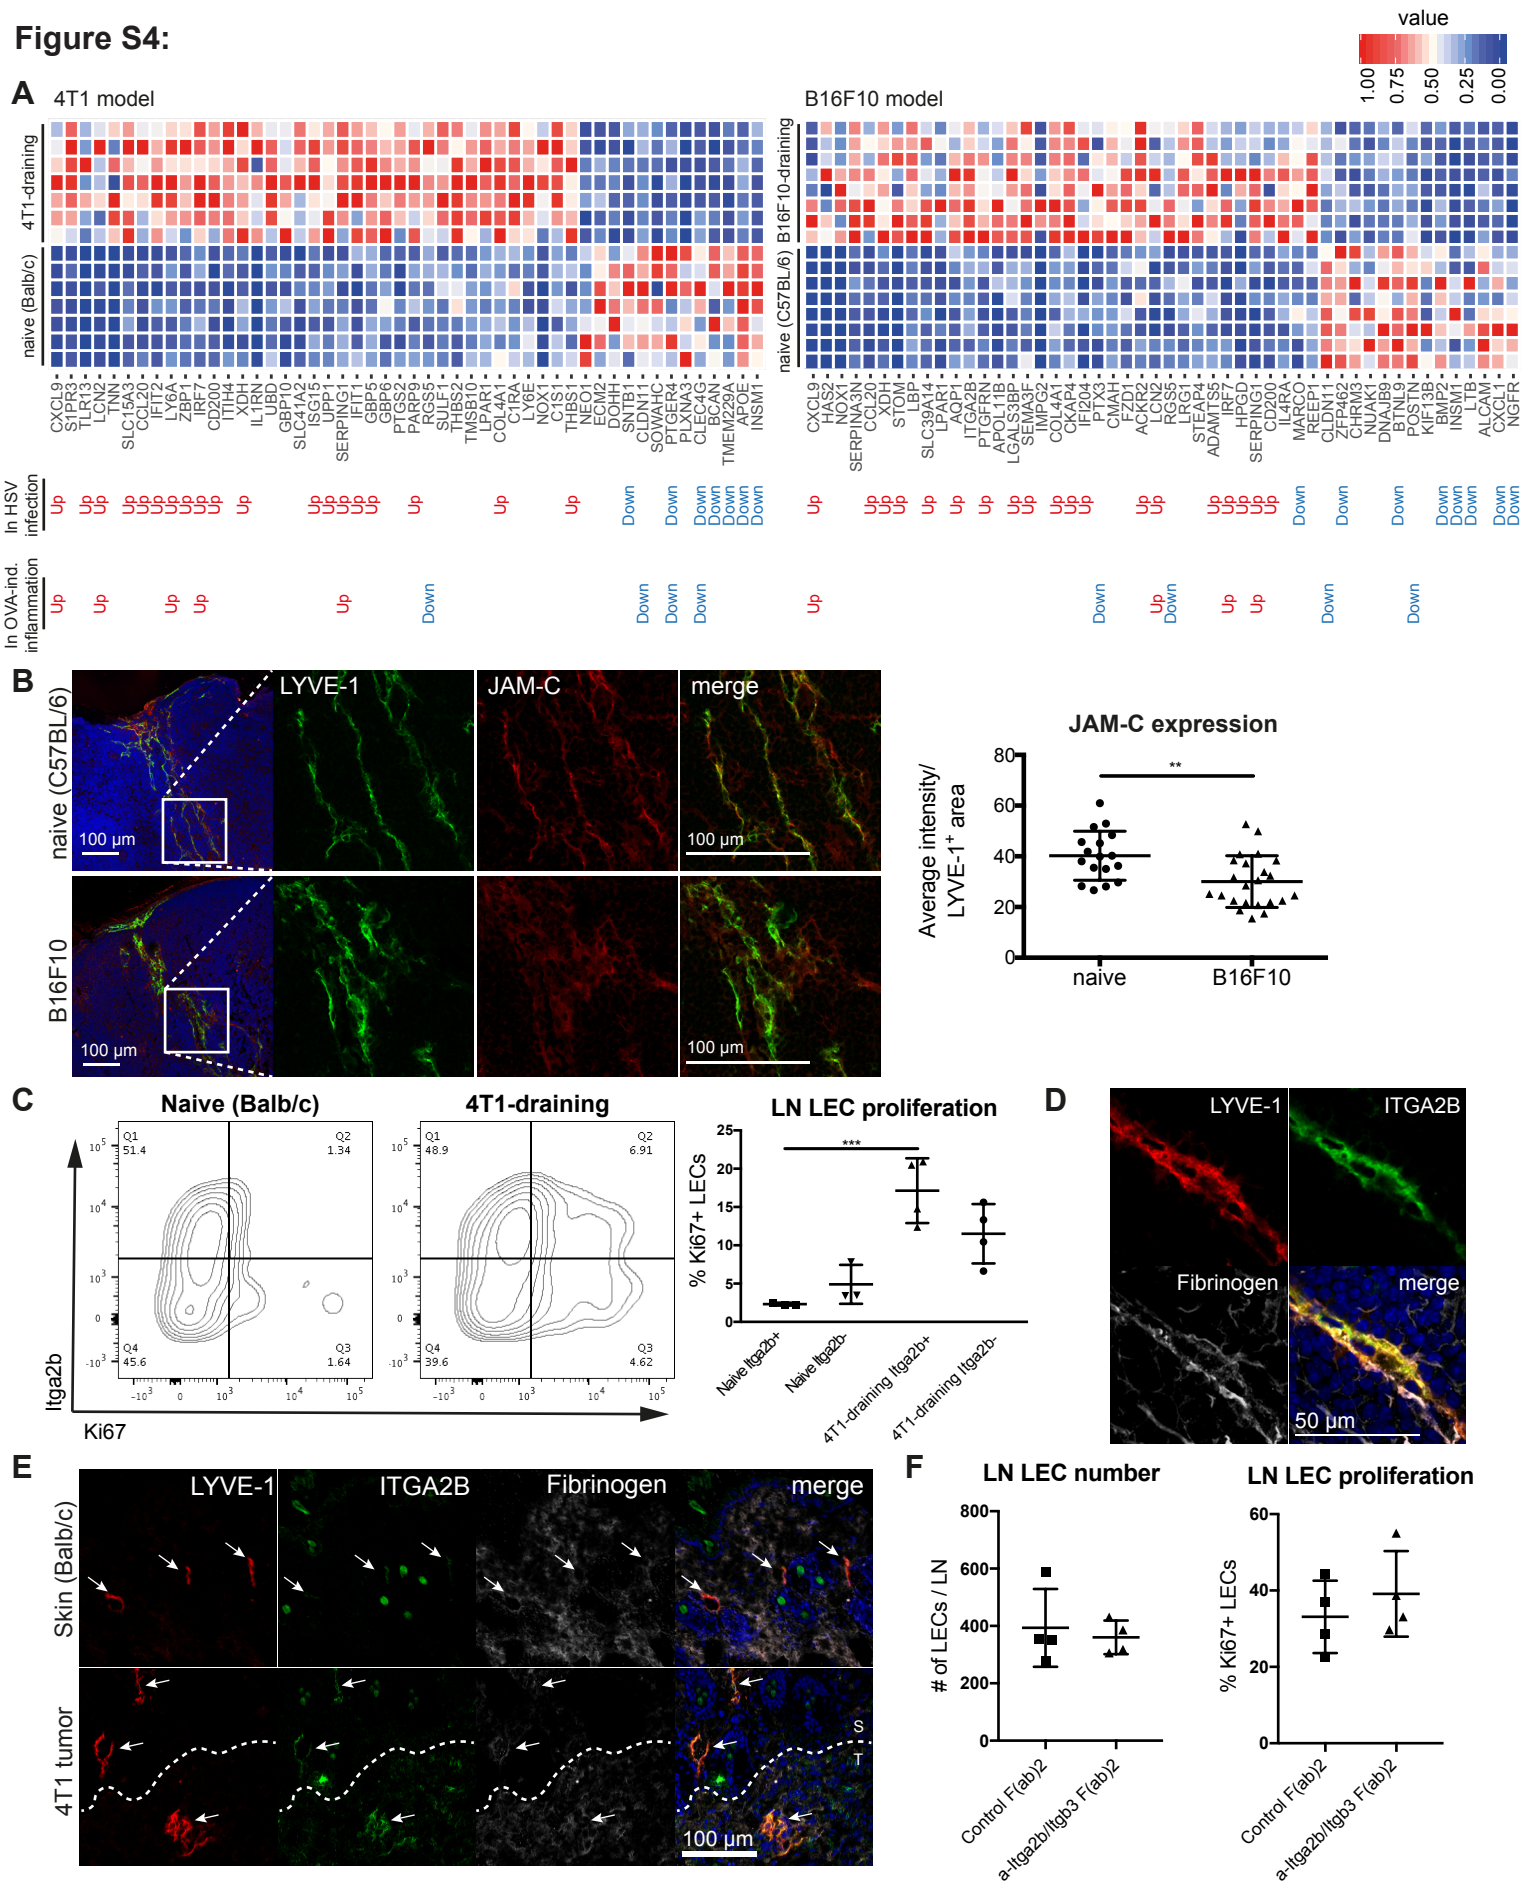



**Figure S4. Differential gene expression in LECs from tumor-draining LNs compared to naïve controls. Related to Figures 3 and 4.**

(A) Heat map of top 50 most differentially expressed genes is shown for both tumor models separately (left: 4T1 vs. naïve Balb/c; right: B16F10 vs. naïve C57BL/6). Significant up- or downregulation in previously published gene expression datasets of LN LECs after HSV infection (Gregory et al., 2017) or after ovalbumin injection in OT-1 transferred mice (Malhotra et al., 2012) is indicated. (B) Representative immunofluorescence images and quantification of JAM-C staining intensity within LYVE-1 positive lymphatic structures of naïve and B16F10 tumor-draining LNs. Each dot represents one image, n = 8 individual LNs per group. Statistical significance was determined by the unpaired Student's t-test. (C) FACS analysis of LN LECs in naïve Balb/c and 4T1-bearing mice (day 10) for expression of integrin  $\alpha$ IIb and Ki67. Example plots (left panels) and quantification (right panels, n = 3-4 mice / group) are shown. (D) Representative immunofluorescence image of fibrinogen localization around an integrin  $\alpha$ IIb expressing lymphatic vessel in a 4T1 draining LN (day 20). (E) Representative immunofluorescence images of integrin  $\alpha$ IIb expression and fibrinogen deposition in lymphatic vessels in control skin and primary 4T1 tumors (day 20). (F) FACS analysis of draining LN LEC numbers and proliferation rate (as determined by Ki67 staining) in 4T1-bearing mice (day 10) treated daily from day 4 on with a rat IgG2b F(ab)2 fragment or an integrin  $\alpha$ IIb blocking F(ab)2 fragment.

**Table S1:**

| sample         | FACS sorted cell number |      |       |       | RNA extraction |                   |                | DNA library prep  |               |       |
|----------------|-------------------------|------|-------|-------|----------------|-------------------|----------------|-------------------|---------------|-------|
|                | LEC                     | BEC  | FRC   | TN    | RIN            | RNA conc. [pg/μl] | total RNA [ng] | DNA conc. [pg/μl] | Molarity [nM] |       |
| Balb/c         | N1                      | 5016 | 8431  | /     | /              | 8.6               | 251            | 2.51              | 6350          | 24.40 |
|                | N2                      | 2076 | 10135 | /     | /              | 9.9               | 234            | 2.34              | 5480          | 23.00 |
|                | N3                      | 3105 | 8532  | /     | /              | 8.6               | 459            | 4.59              | 2630          | 10.60 |
|                | N4                      | 4225 | 10299 | /     | /              | 7.8               | 221            | 2.21              | 5130          | 20.00 |
|                | N5                      | 2768 | 11378 | 10034 | 68533          | 8.7               | 499            | 4.99              | 820           | 3.15  |
|                | N6                      | 3049 | 8810  | 12110 | 57358          | 9                 | 660            | 6.60              | 2970          | 11.60 |
|                | N7                      | 2788 | 8985  | 9794  | 66826          | 8.4               | 548            | 5.48              | 4450          | 17.20 |
| <b>average</b> | 3290                    | 9510 | 10646 | 64239 |                |                   |                |                   |               |       |
| 4T1            | T1                      | 1832 | 7569  | /     | /              | 9.8               | 382            | 3.82              | 806           | 3.31  |
|                | T2                      | 2399 | 6682  | /     | /              | 9.3               | 462            | 4.62              | 1690          | 6.92  |
|                | T3                      | 2201 | 6358  | /     | /              | 10                | 401            | 4.01              | 3320          | 13.40 |
|                | T4                      | 2487 | 5443  | /     | /              | 7.9               | 709            | 7.09              | 1960          | 7.50  |
|                | T5                      | 1313 | 5536  | 5063  | 89048          | 8.8               | 236            | 2.36              | 4280          | 16.50 |
|                | T6                      | 2293 | 5987  | 6139  | 91335          | 8                 | 535            | 5.35              | 3310          | 13.40 |
|                | T7                      | 2719 | 6064  | 7999  | 94794          | 9.1               | 384            | 3.84              | 4170          | 15.00 |
| <b>average</b> | 2178                    | 6234 | 6400  | 91726 |                |                   |                |                   |               |       |
| C57BL/6        | N1                      | 1415 | 7762  | 5866  | 11482          | 8.4               | 238            | 2.38              | 310           | 1.24  |
|                | N2                      | 3193 | 10056 | 8735  | 65806          | 9.3               | 1033           | 10.33             | 2080          | 7.98  |
|                | N3                      | 1925 | 10391 | 3299  | 21926          | 9.0               | 481            | 4.81              | 2660          | 10.70 |
|                | N4                      | 1024 | 1856  | 929   | 14359          | 7.9               | 199            | 1.99              | 2080          | 8.71  |
|                | N5                      | 2134 | 13047 | 3716  | 68532          | 8.4               | 357            | 3.57              | 3710          | 15.20 |
|                | N6                      | 1967 | 12181 | 5175  | 50218          | 8.3               | 667            | 6.67              | 1080          | 4.42  |
|                | N7                      | 2389 | 11294 | 4640  | 62914          | 8.5               | 727            | 7.27              | 5390          | 22.40 |
|                | N8                      | 3006 | 7600  | 5142  | 42456          | 8.6               | 709            | 7.09              | 9             | 0.04  |
| <b>average</b> | 2132                    | 9273 | 4688  | 42212 |                |                   |                |                   |               |       |
| B16F10         | T1                      | 1524 | 5490  | 5363  | 19391          | 9.5               | 369            | 3.69              | 2350          | 9.48  |
|                | T2                      | 719  | 3995  | 2991  | 15776          | 8.6               | 280            | 2.80              | 1900          | 7.52  |
|                | T3                      | 2653 | 5131  | 11385 | 95043          | 9.5               | 1035           | 10.35             | 2200          | 9.14  |
|                | T4                      | 3071 | 7339  | 6376  | 103462         | 9.5               | 1015           | 10.15             | 2920          | 11.60 |
|                | T5                      | 1849 | 8883  | 4414  | 64414          | 8.9               | 592            | 5.92              | 3410          | 14.20 |
|                | T6                      | 3228 | 12168 | 7462  | 32195          | 9.6               | 816            | 8.16              | 8900          | 35.10 |
|                | T7                      | 1860 | 5835  | 3227  | 61444          | 8.9               | 547            | 5.47              | 3670          | 13.90 |
|                | T8                      | 3045 | 11057 | 7245  | 117991         | 8.7               | 688            | 6.88              | 6370          | 26.00 |
| <b>average</b> | 2244                    | 7487 | 6058  | 63715 |                |                   |                |                   |               |       |

**Table S1. List of all samples used for RNA sequencing. Related to Figure 2.**

Number of sorted LN stromal cells, LEC RNA quality (RIN) and quantity, and cDNA concentration in the libraries are shown for all samples used in this study. n = 7-8 samples per group.

**Table S2:**

| Cluster                                       | BP (Biological Process)                               |                                              |              | Molecular Function (MF) |                                             |                                                              | Cellular Composition (CC) |             |                                    |                      |             |             |        |
|-----------------------------------------------|-------------------------------------------------------|----------------------------------------------|--------------|-------------------------|---------------------------------------------|--------------------------------------------------------------|---------------------------|-------------|------------------------------------|----------------------|-------------|-------------|--------|
|                                               | Term                                                  | ID                                           | p            | N                       | Term                                        | ID                                                           | p                         | N           | Term                               | ID                   | p           | N           |        |
| <b>Cluster 1</b>                              | immune system process                                 | GO:0002376                                   | 7.252306e-09 | 18/187                  | extracellular matrix binding                | GO:0050840                                                   | 5.97E-06                  | 5/16        | extracellular region               | GO:0005576           | 1.39104E-11 | 33/471      |        |
|                                               | positive regulation of macrophage activation          | GO:0043032                                   | 3.531137e-06 | 4/7                     | scavenger receptor activity                 | GO:0005044                                                   | 1.52E-05                  | 5/19        | cell surface                       | GO:0009986           | 6.5854E-11  | 25/289      |        |
|                                               | innate immune response                                | GO:0045087                                   | 3.699133e-07 | 15/168                  | calcium ion binding                         | GO:0005509                                                   | 2.55E-05                  | 15/244      | membrane                           | GO:0016020           | 5.0658E-09  | 109/3895    |        |
|                                               | cellular response to interferon-gamma                 | GO:0071346                                   | 1.036803e-06 | 6/20                    | chemorepellent activity                     | GO:0045499                                                   | 5.23E-05                  | 3/5         | plasma membrane                    | GO:0005886           | 2.13435E-07 | 58/1664     |        |
|                                               | cell adhesion                                         | GO:0007155                                   | 5.197905e-07 | 24/247                  | collagen binding                            | GO:0005518                                                   | 5.51E-05                  | 6/39        | extracellular matrix               | GO:0031012           | 1.13981E-05 | 10/99       |        |
|                                               | defense response                                      | GO:0006952                                   | 9.695147e-06 | 5/17                    | extracellular matrix structural constituent | GO:0005201                                                   | 8.10E-08                  | 4/14        | proteinaceous extracellular matrix | GO:0005578           | 1.81583E-05 | 11/27       |        |
|                                               | adhesion of symbiont to host                          | GO:0044406                                   | 1.235389e-05 | 4/9                     |                                             |                                                              |                           |             | endoplasmic reticulum              | GO:0005783           | 5.45918E-05 | 32/853      |        |
|                                               | negative regulation of endothelial cell proliferation | GO:0001937                                   | 3.005367e-05 | 5/21                    |                                             |                                                              |                           |             |                                    |                      |             |             |        |
|                                               | negative regulation of angiogenesis                   | GO:0016525                                   | 3.461842e-05 | 6/35                    |                                             |                                                              |                           |             |                                    |                      |             |             |        |
|                                               | <b>Cluster 2</b>                                      | response to cAMP                             | GO:0051591   | 6.61424E-06             | 5/14                                        | transcription factor activity, sequence-specific DNA binding | GO:0003700                | 5.08779E-07 | 27/436                             | nuclear chromatin    | GO:0000790  | 6.73611E-05 | 11/127 |
|                                               |                                                       | SMAD protein signal transduction             | GO:0060396   | 3.747705E-05            | 6/91                                        | transcriptional activator activity                           | GO:0001077                | 7.30895E-05 | 11/26                              |                      |             |             |        |
|                                               |                                                       | positive regulation of cell differentiation  | GO:0045597   | 4.62223E-05             | 5/20                                        | protein binding                                              | GO:0005515                | 2.70703E-05 | 88/2845                            |                      |             |             |        |
|                                               |                                                       | transcription, DNA-templated                 | GO:0006351   | 6.83504E-05             | 46/1242                                     | DNA binding                                                  | GO:0003677                | 5.72488E-05 | 41/1036                            |                      |             |             |        |
| transcription from RNA polymerase II promoter |                                                       | GO:0006366                                   | 1.7366E-05   | 17/248                  | sequence-specific DNA binding               | GO:0043565                                                   | 1.19057E-06               | 20/271      |                                    |                      |             |             |        |
| negative regulation of transcription          |                                                       | GO:0000122                                   | 1.18991E-08  | 31/471                  |                                             |                                                              |                           |             |                                    |                      |             |             |        |
| positive regulation of transcription          |                                                       | GO:0046944                                   | 2.49249E-08  | 65/598                  |                                             |                                                              |                           |             |                                    |                      |             |             |        |
| regulation of transcription, DNA templated    |                                                       | GO:0006355                                   | 5.73019E-06  | 57/1308                 |                                             |                                                              |                           |             |                                    |                      |             |             |        |
| response to mechanical stimulus               |                                                       | GO:0009612                                   | 8.13038E-05  | 4/12                    |                                             |                                                              |                           |             |                                    |                      |             |             |        |
| <b>Cluster 3</b>                              |                                                       | response to virus                            | GO:0009615   | 4.43297E-06             | 5/43                                        | chemokine activity                                           | GO:0008009                | 5.44971E-05 | 3/13                               | extracellular region | GO:0005576  | 2.33269E-06 | 13/471 |
|                                               |                                                       | defense response to virus                    | GO:0051607   | 7.22143E-10             | 9/81                                        |                                                              |                           |             |                                    |                      |             |             |        |
|                                               |                                                       | cellular response to interferon-beta         | GO:0035458   | 5.61888E-06             | 4/21                                        |                                                              |                           |             |                                    |                      |             |             |        |
|                                               |                                                       | G-protein coupled receptor signaling pathway | GO:0007186   | 1.00859E-05             | 7/132                                       |                                                              |                           |             |                                    |                      |             |             |        |
|                                               | immune system process                                 | GO:0002376                                   | 1.0928E-05   | 8/187                   |                                             |                                                              |                           |             |                                    |                      |             |             |        |
|                                               | inflammatory response                                 | GO:0006954                                   | 5.49557E-05  | 6/117                   |                                             |                                                              |                           |             |                                    |                      |             |             |        |
| <b>Cluster 4</b>                              | N/A                                                   |                                              |              |                         |                                             |                                                              |                           |             |                                    |                      |             |             |        |
|                                               | N/A                                                   |                                              |              |                         |                                             |                                                              |                           |             |                                    |                      |             |             |        |
| <b>Cluster 5</b>                              | N/A                                                   |                                              |              |                         |                                             |                                                              |                           |             |                                    |                      |             |             |        |
|                                               | N/A                                                   |                                              |              |                         |                                             |                                                              |                           |             |                                    |                      |             |             |        |
| <b>Cluster 6</b>                              | cell division                                         | GO:0051301                                   | 1.20509E-05  | 5/259                   |                                             |                                                              |                           |             |                                    |                      |             |             |        |
|                                               | mitotic nuclear division                              | GO:0007067                                   | 3.49154E-05  | 4/194                   |                                             |                                                              |                           |             |                                    |                      |             |             |        |
| <b>Cluster 7</b>                              | N/A                                                   |                                              |              |                         |                                             |                                                              |                           |             |                                    |                      |             |             |        |
|                                               | N/A                                                   |                                              |              |                         |                                             |                                                              |                           |             |                                    |                      |             |             |        |
| <b>Cluster 8</b>                              | extracellular space                                   | GO:0005615                                   | 1.93289E-05  | 6/462                   |                                             |                                                              |                           |             |                                    |                      |             |             |        |
|                                               | N/A                                                   |                                              |              |                         |                                             |                                                              |                           |             |                                    |                      |             |             |        |

**Table S2. Complete list of gene ontologies (GOs) associated with the clusters in Figure 3A. Related to Figure 3.**

**Movie S1. Optical sectioning reveals the lymphatic network architecture in resting LNs of naïve mice. Related to Figure 1.**  
Consecutive 3D light-sheet microscope images of a whole naïve LN stained for the lymphatic marker LYVE-1.

**Movie S2. Optical sectioning reveals altered lymphatic network architecture in 4T1 tumor-draining LNs. Related to Figure 1.**  
Consecutive 3D light-sheet microscope images of a whole 4T1 tumor-draining LN stained for the lymphatic marker LYVE-1.
